# Supplementary material
Source: Research Square preprint supplement (doi:10.21203/rs.3.rs-8899290/v1)
Supplement: Supplementary file 1 [file 7471170b5082b0f1cc71605d.docx]

**Titles of supplementary material**

**Table A: Results for LCMS analysis of Triphala Powder Extract (TPE)**

| **Sr no.** | **Mode of ionization** | **Name of compound** | **RT** | **%** | **theoretical m/z** | **Observed**  **m/z** |
| --- | --- | --- | --- | --- | --- | --- |
| 1 | - ve | Gallic Acid | 3.024 | 4.85 | 170.13 | 169.1 |
| 2 | - ve | Ellagic Acid | 6.287 | 0.435 | 302.5 | 300.9 |
| 3 | - ve | Quercetin | 7.772 | 0.00023601 | 302.25 | 301.1 |
| 4 | + ve | β-sitosterol | 9.957 | 0.0000203774 | 414.71 | 415.0 |

**Table B: Various docking parameters used in grid generation.**

|  | Centre of the grid box | | | Dimension of the grid box | | |  |
| --- | --- | --- | --- | --- | --- | --- | --- |
| PDB | X | Y | Z | X | Y | Z | Grid spacing (Å) |
| 1GKC | 64.459 | 31.913 | 116.569 | 44 | 54 | 62 | 0.375 |

**Figure A: Mass spectra for Gallic acid, Ellagic acid, Quercetin and β-sitosterol**

| Gallic acid | Ellagic acid |
| --- | --- |
| Quercetin | Β-sitosterol |
